# Supplementary material
Source: publisher site journal article supplement (https://www.degruyter.com/publication/journal_key/OPENEC/downloadAsset/OPENEC_CFP%20Eco-Entrepreneurship.pdf)
Supplement: Supplementary file 1 [file OPENEC_CFP%20Eco-Entrepreneurship.pdf]

## GUEST EDITOR

---

Dr. Eijaz Ahmed Khan, Melbourne Institute of Technology, Sydney, Australia

## DESCRIPTION

---

**Open Economics** is a peer-reviewed Open Access journal, devoted to the publication of original research in all fields of Economics.

This **topical issue** aims to gather analyses and reviews that enhance the understanding of the eco-entrepreneurship, with special attention to the emerging issues and policy. Original empirical research papers that make clear contributions to the field are especially welcome.

## SCOPE

---

The scope of this Topical Issue includes, but is not limited to, the following areas of research:

- ▶ Eco-innovations
- ▶ Green economy
- ▶ Trade and the environment
- ▶ Technology and the environment
- ▶ Environmental policy
- ▶ Pollution control
- ▶ Sustainable entrepreneurship
- ▶ Circular economy and entrepreneurship
- ▶ Green startups
- ▶ Transparency

## HOW TO SUBMIT

---

Authors are kindly invited to submit their contribution via online submission system Editorial Manager available at [www.editorialmanager.com/economics](http://www.editorialmanager.com/economics)

Please remember about choosing **correct article category** – **TI: Eco entrepreneurship** to ensure that it will be processed with the highest priority.

Before completing their manuscript, authors should carefully read over the journal's [Instruction for Authors](#). Additional information can be found in our [Editorial Policy](#).

In case of any questions please contact the Managing Editor of Open Economics, **Konrad Sarzyński** [konrad.sarzynski@degruyter.com](mailto:konrad.sarzynski@degruyter.com).

## TIMELINE

---

Deadline for article submission: **September 30, 2020** via journal submission system [www.editorialmanager.com/economics](http://www.editorialmanager.com/economics).

Planned publication: December 2020 (articles will be published upon being accepted on an ongoing basis).
